# Supplementary material for: Analysis of Ice Phenology of Middle and Large Lakes on the Tibetan Plateau
Source: MDPI journal article supplement (doi:10.3390/s23031661), 2023-02-02
Supplement: s1 [file s1]

## Supplementary Materials

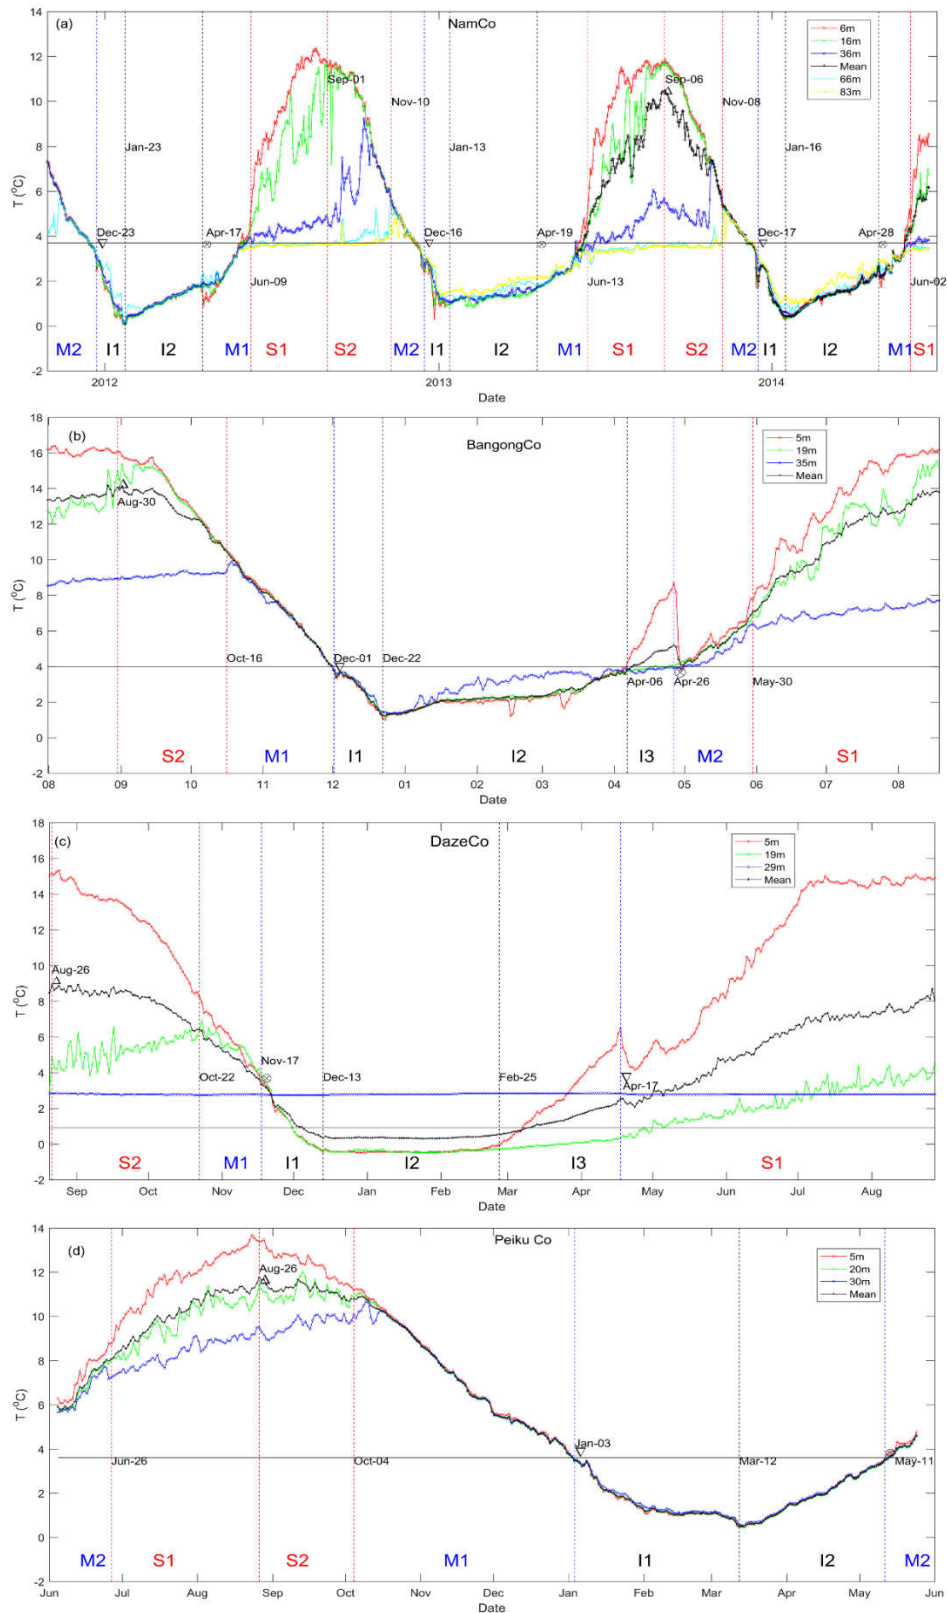

**Figure S1.** Lake temperature curves at different depth. (a) Lake temperature curves of Nam Co during November 2011-June 2014. (b) Lake temperature curves of Bangong Co during July 2012-August 2013. (c) Lake temperature curves of Daze Co during August 2012-August 2013. (d) Lake temperature curves of Peiku Co during June 2016-May 2017. Note: the contents will be published by Binbin Wang.

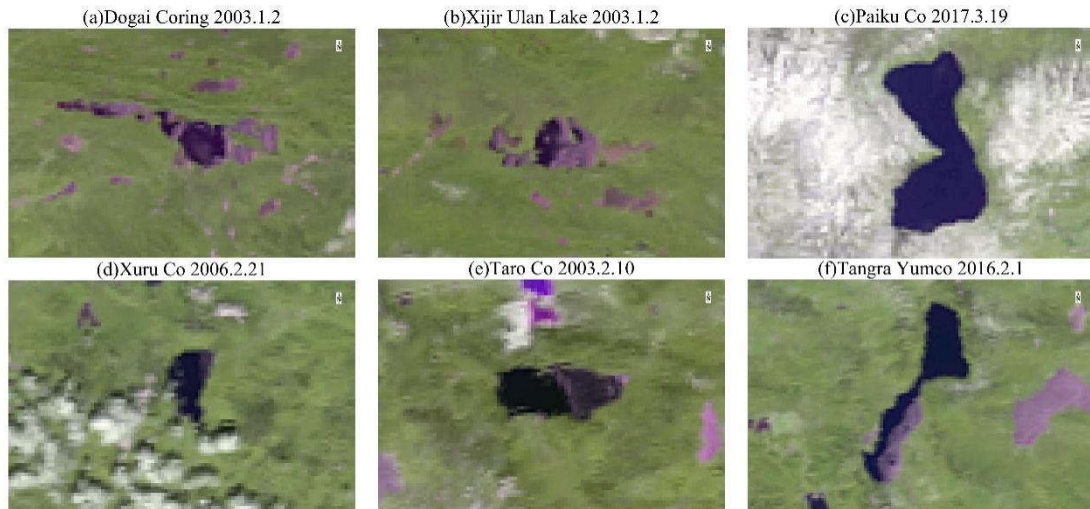

**Figure S2.** MODIS false-color composite image of unfrozen/incompletely frozen lakes. (a) MODIS false-color composite image of Dogai Coring on 2 January 2003. (b) MODIS false-color composite image of Xijir Ulan Lake on 2 January 2003. (c) MODIS false-color composite image of Paiku Co on 19 March 2017. (d) MODIS false-color composite image of Xuru Co on 21 February 2006. (e) MODIS false-color composite image of Taro Co on 10 February 2003. (f) MODIS false-color composite image of Tangra Yumco on 1 February 2016.

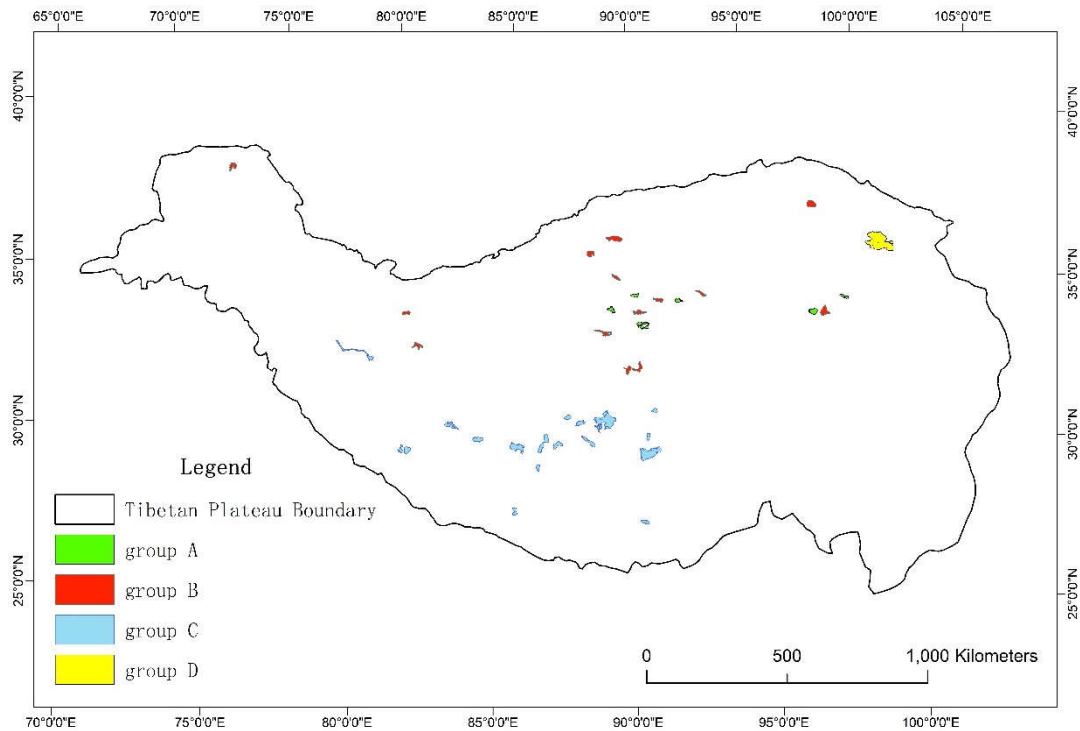

**Figure S3.** The classification result of lakes. Studied lakes are divided into four groups labeled as A, B, C, and D. Group A: FID9, FID13, FID14, FID15, FID18, FID19; Group B: FID1, FID2, FID3, FID4, FID6, FID7, FID8, FID10, FID11, FID12, FID16, FID17, FID20, FID40; Group C: FID5, FID22, FID23, FID24, FID25, FID26, FID27, FID28, FID29, FID30, FID31, FID32, FID33, FID34, FID35, FID36, FID37, FID38, FID39; Group D: FID21. FID numbers and the positions of lakes are shown in Table 1 and Figure 1.

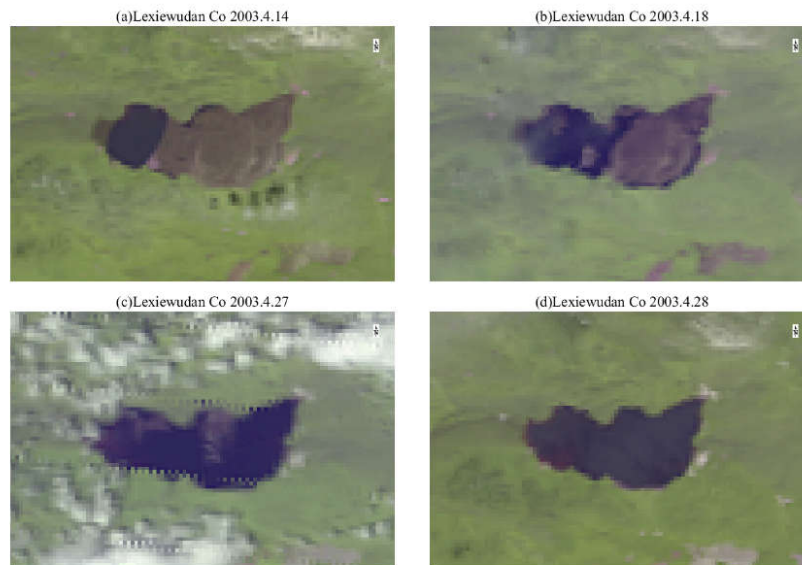

**Figure S4.** The ice melting process of Lexiewudan Co during 2002 to 2003. (a) MODIS false-color composite image of Lexiewudan Co on 14 April 2003. (b) MODIS false-color composite image of Lexiewudan Co on 18 April 2003. (c) MODIS false-color composite image of Lexiewudan Co on 27 April 2003. (d) MODIS false-color composite image of Lexiewudan Co on 28 April 2003.

**Table S1.** Unfrozen/incompletely frozen lakes during 2002 to 2021. NF is the abbreviation for not frozen, and NCF is the abbreviation for not completely frozen. Blank means frozen.

| FID | Name            | 2002 | 2003 | 2004 | 2005 | 2006 | 2007 | 2008 | 2009 | 2010 |
|-----|-----------------|------|------|------|------|------|------|------|------|------|
| 10  | Dogai Coring    | NCF  |      |      |      |      |      |      |      |      |
| 16  | Xijir Ulan Lake | NF   | NF   | NF   | NCF  |      |      |      |      |      |
| 25  | Taro Co         | NCF  |      |      |      |      |      |      |      |      |
| 27  | Paiku Co        |      |      |      | NF   | NF   |      | NF   | NCF  |      |
| 34  | Tangra Yumco    |      |      |      |      |      |      |      |      |      |
| 35  | Xuru Co         |      |      | NCF  | NF   | NF   |      | NF   | NF   | NF   |
| FID | Name            | 2012 | 2013 | 2014 | 2015 | 2016 | 2017 | 2018 | 2019 | 2020 |
| 10  | Dogai Coring    |      |      |      |      |      |      |      |      |      |
| 16  | Xijir Ulan Lake |      |      |      |      |      |      |      |      |      |
| 25  | Taro Co         |      |      |      |      |      |      |      |      |      |
| 27  | Paiku Co        |      |      |      | NF   | NF   | NF   |      |      | NF   |
| 34  | Tangra Yumco    |      |      |      | NCF  | NCF  |      |      |      |      |
| 35  | Xuru Co         | NCF  | NCF  |      | NF   | NCF  | NCF  |      |      | NF   |

**Table S2:** Average freeze-up duration (FUD), break-up duration (BUD), lake ice cover duration (ID), and completely ice cover duration (CID) of each lake ice phenology dataset. Time between freeze-up start date and freeze-up end date determines the FUD, while time between break-up start date and break-up end date determines the BUD. ID is defined as the period between freeze-up start date and break-up end date, and CID is defined as the period between freeze-up end date and break-up start date. All variables are in “days”. FID numbers indicate the lakes, with lake information shown in Table 1.

[illegible]

|    |    |    |     |     |  |  |  |  |    |    |     |     |    |    |     |     |
|----|----|----|-----|-----|--|--|--|--|----|----|-----|-----|----|----|-----|-----|
| 28 | 5  | 14 | 122 | 103 |  |  |  |  | 10 | 18 | 133 | 105 | 9  | 16 | 135 | 110 |
| 29 |    |    | 109 |     |  |  |  |  | 20 | 39 | 116 | 57  | 15 | 18 | 123 | 90  |
| 30 |    |    |     |     |  |  |  |  | 27 | 10 | 126 | 89  |    |    |     |     |
| 31 | 17 | 14 | 120 | 89  |  |  |  |  | 30 | 20 | 142 | 92  | 15 | 14 | 121 | 92  |
| 32 |    |    |     |     |  |  |  |  | 19 | 18 | 113 | 76  | 24 | 27 | 120 | 69  |
| 33 | 7  | 15 | 119 | 97  |  |  |  |  | 13 | 28 | 133 | 92  | 14 | 24 | 135 | 97  |
| 34 |    |    |     |     |  |  |  |  | 8  | 71 | 95  | 16  |    |    |     |     |
| 35 |    |    |     |     |  |  |  |  | 8  | 56 | 70  | 6   |    |    |     |     |
| 36 | 6  | 15 | 136 | 115 |  |  |  |  | 9  | 13 | 146 | 124 | 12 | 17 | 152 | 123 |
| 37 |    |    | 118 |     |  |  |  |  | 34 | 26 | 132 | 72  |    |    |     |     |
| 38 |    |    | 117 |     |  |  |  |  | 40 | 41 | 131 | 50  | 12 | 26 | 112 | 74  |
| 39 |    |    | 120 |     |  |  |  |  | 15 | 8  | 129 | 106 | 39 | 27 | 135 | 69  |
| 40 | 8  | 13 | 184 | 163 |  |  |  |  | 15 | 19 | 181 | 147 | 12 | 19 | 192 | 161 |

| FID | Guo et al., 2022 |     |     |     | Qiu, 2018         |     |     |     | Qiu, 2019             |     |     |     | This study        |     |     |     |
|-----|------------------|-----|-----|-----|-------------------|-----|-----|-----|-----------------------|-----|-----|-----|-------------------|-----|-----|-----|
|     | Model and MODIS, |     |     |     | AMSR-E, 2002-2011 |     |     |     | passive microwave,    |     |     |     | AMSR-E, 2002-2011 |     |     |     |
|     | 1978-2016        |     |     |     | AMSR-2, 2012-2016 |     |     |     | 2002-2018,            |     |     |     | AMSR-2, 2012-2021 |     |     |     |
|     |                  |     |     |     | MWRI, 2011-2016   |     |     |     | some extended to 1978 |     |     |     |                   |     |     |     |
|     | FUD              | BUD | ID  | CID | FUD               | BUD | ID  | CID | FUD                   | BUD | ID  | CID | FUD               | BUD | ID  | CID |
| 1   |                  |     |     |     |                   |     |     |     |                       |     |     |     | 18                | 16  | 182 | 148 |
| 2   | 18               | 5   | 101 | 78  |                   |     |     |     | 16                    | 13  | 84  | 55  | 9                 | 10  | 117 | 98  |
| 3   | 12               | 9   | 198 | 177 | 8                 | 10  | 201 | 183 | 6                     | 22  | 205 | 177 | 8                 | 13  | 204 | 183 |
| 4   | 22               | 13  | 226 | 191 |                   |     |     |     | 12                    | 18  | 230 | 200 | 6                 | 9   | 221 | 206 |
| 5   | 26               | 29  | 140 | 85  |                   |     |     |     | 7                     | 6   | 103 | 90  | 7                 | 6   | 105 | 92  |
| 6   | 12               | 16  | 187 | 159 | 8                 | 14  | 184 | 162 | 11                    | 12  | 177 | 154 | 8                 | 11  | 181 | 162 |
| 7   | 11               | 12  | 166 | 143 | 8                 | 11  | 178 | 159 | 9                     | 11  | 172 | 152 | 11                | 14  | 182 | 157 |
| 8   | 17               | 22  | 223 | 184 |                   |     |     |     |                       |     |     |     | 6                 | 11  | 211 | 194 |
| 9   | 12               | 4   | 174 | 158 | 7                 | 11  | 189 | 171 |                       |     |     |     | 6                 | 10  | 195 | 179 |
| 10  |                  |     |     |     | 13                | 10  | 110 | 87  | 25                    | 20  | 103 | 58  | 14                | 15  | 115 | 86  |
| 11  | 21               | 13  | 183 | 149 | 9                 | 8   | 181 | 164 | 6                     | 10  | 183 | 167 | 6                 | 10  | 183 | 167 |
| 12  | 18               | 15  | 236 | 203 | 11                | 13  | 233 | 209 | 16                    | 24  | 238 | 198 | 9                 | 13  | 235 | 213 |
| 13  | 16               | 13  | 215 | 186 | 8                 | 9   | 207 | 190 |                       |     |     |     | 7                 | 14  | 207 | 186 |
| 14  | 28               | 48  | 223 | 147 | 17                | 21  | 223 | 185 |                       |     |     |     | 16                | 13  | 221 | 192 |
| 15  | 13               | 15  | 180 | 152 | 13                | 15  | 182 | 154 | 7                     | 8   | 166 | 151 | 11                | 13  | 194 | 170 |
| 16  | 27               | 25  | 165 | 113 |                   |     |     |     | 12                    | 12  | 142 | 118 | 17                | 14  | 150 | 119 |
| 17  | 49               | 19  | 207 | 139 |                   |     |     |     | 8                     | 9   | 178 | 161 | 8                 | 10  | 181 | 163 |
| 18  | 18               | 12  | 154 | 124 |                   |     |     |     | 8                     | 12  | 152 | 132 | 8                 | 13  | 158 | 137 |
| 19  | 31               | 29  | 175 | 115 | 25                | 21  | 167 | 121 | 14                    | 16  | 159 | 129 | 6                 | 11  | 156 | 139 |
| 20  | 28               | 10  | 167 | 129 | 21                | 14  | 161 | 126 | 9                     | 11  | 159 | 139 | 11                | 14  | 165 | 140 |
| 21  | 19               | 11  | 109 | 79  | 10                | 9   | 103 | 84  | 18                    | 22  | 121 | 81  | 18                | 14  | 116 | 84  |
| 22  | 32               | 14  | 154 | 108 | 11                | 14  | 136 | 111 | 16                    | 15  | 128 | 97  | 5                 | 10  | 130 | 115 |
| 23  | 11               | 14  | 106 | 81  | 14                | 12  | 115 | 89  |                       |     |     |     | 10                | 10  | 106 | 86  |
| 24  | 28               | 16  | 157 | 113 | 14                | 10  | 145 | 121 | 11                    | 14  | 142 | 117 | 13                | 9   | 147 | 125 |
| 25  | 7                | 76  | 98  | 15  |                   |     |     |     |                       |     |     |     | 9                 | 11  | 82  | 62  |

|    |    |    |     |     |    |    |     |     |    |    |     |     |    |    |     |     |
|----|----|----|-----|-----|----|----|-----|-----|----|----|-----|-----|----|----|-----|-----|
| 26 | 14 | 14 | 113 | 85  | 8  | 8  | 106 | 90  | 12 | 13 | 108 | 83  | 14 | 13 | 115 | 88  |
| 27 | 27 | 21 | 92  | 44  |    |    |     |     |    |    |     |     | 10 | 11 | 85  | 64  |
| 28 | 8  | 16 | 125 | 101 | 7  | 7  | 126 | 112 | 9  | 19 | 115 | 87  | 9  | 8  | 123 | 106 |
| 29 | 21 | 68 | 121 | 32  |    |    |     |     |    |    |     |     | 7  | 9  | 105 | 89  |
| 30 | 47 | 66 | 151 | 38  |    |    |     |     | 8  | 12 | 136 | 116 | 8  | 13 | 120 | 99  |
| 31 | 16 | 11 | 121 | 94  | 8  | 10 | 110 | 92  | 18 | 20 | 125 | 87  | 14 | 12 | 115 | 89  |
| 32 | 25 | 19 | 113 | 69  |    |    |     |     |    |    |     |     | 5  | 10 | 108 | 93  |
| 33 | 11 | 30 | 125 | 84  | 9  | 12 | 125 | 104 |    |    |     |     | 6  | 9  | 124 | 109 |
| 34 |    |    |     |     |    |    |     |     |    |    |     |     | 10 | 11 | 89  | 68  |
| 35 |    |    |     |     |    |    |     |     |    |    |     |     | 15 | 16 | 88  | 57  |
| 36 | 7  | 16 | 139 | 116 | 7  | 7  | 139 | 125 |    |    |     |     | 10 | 8  | 136 | 118 |
| 37 | 18 | 24 | 128 | 86  | 12 | 7  | 123 | 104 |    |    |     |     | 10 | 9  | 123 | 104 |
| 38 | 22 | 39 | 130 | 69  | 8  | 15 | 102 | 79  | 17 | 28 | 113 | 68  | 11 | 11 | 96  | 74  |
| 39 | 11 | 41 | 129 | 77  |    |    |     |     |    |    |     |     | 10 | 10 | 126 | 106 |
| 40 | 17 | 27 | 189 | 145 | 12 | 13 | 190 | 165 | 11 | 16 | 182 | 155 | 8  | 12 | 192 | 172 |

**Table S3.** Average values of basic characteristics and ice phenology for each lake group. The number of lakes in each group (N), altitude (Alt), latitude (Lat), lake area (Area), average temperature in December (T-12), average temperature in June (T-6), annual shortwave radiation (SW), and snow depth (SD) are considered. Lake ice phenology parameters include freeze-up start date (FUS), freeze-up end date (FUE), break-up start date (BUS), break-up end date (BUE), and the period between freeze-up start date and break-up end date (ID).

| Group | N  | Alt<br>(m) | Lat<br>(°) | Area<br>(km <sup>2</sup> ) | T-12<br>(K) | T-6<br>(K) | SW<br>(Wm <sup>-2</sup> ) | SD<br>(m) |
|-------|----|------------|------------|----------------------------|-------------|------------|---------------------------|-----------|
| A     | 6  | 4608.8     | 35.3       | 339.9                      | 250.8       | 270.6      | 237.4                     | 0.09      |
| B     | 14 | 4560.5     | 35.8       | 412.3                      | 252.8       | 270.7      | 239.7                     | 0.01      |
| C     | 19 | 4601.7     | 31.1       | 589.8                      | 260.6       | 275.6      | 254.6                     | 0.01      |
| D     | 1  | 3191       | 37         | 4204.5                     | 261.3       | 280.3      | 219.5                     | 0         |

  

| Group | FUS    | FUE    | BUS    | BUE    | ID (day) |
|-------|--------|--------|--------|--------|----------|
| A     | 11-Nov | 28-Nov | 30-Apr | 18-May | 188      |
| B     | 19-Nov | 6-Dec  | 1-May  | 20-May | 182      |
| C     | 24-Dec | 8-Jan  | 29-Mar | 21-Apr | 118      |
| D     | 14-Dec | 31-Dec | 23-Mar | 6-Apr  | 113      |

**Table S4.** Lake ice phenology parameters during 2002 to 2021 in Nam Co extracted by the western pixel.

| Year      | FUS       | FUE       | BUS       | BUE       |
|-----------|-----------|-----------|-----------|-----------|
| 2002-2003 | 2003/1/13 | 2003/1/20 | 2003/4/5  | 2003/4/26 |
| 2003-2004 | 2004/1/16 | 2004/1/26 | 2004/3/25 | 2004/4/12 |
| 2004-2005 | 2005/1/16 | 2005/2/2  | 2005/4/27 | 2005/5/8  |
| 2005-2006 | 2006/1/24 | 2006/1/31 | 2006/4/9  | 2006/4/23 |
| 2006-2007 | 2007/1/22 | 2007/2/1  | 2007/4/23 | 2007/5/3  |
| 2007-2008 | 2008/1/21 | 2008/2/1  | 2008/4/28 | 2008/5/16 |
| 2008-2009 | NCF       | NCF       | NCF       | NCF       |
| 2009-2010 | 2010/1/25 | 2010/2/6  | 2010/3/30 | 2010/4/11 |
| 2010-2011 | 2011/1/26 | 2011/2/3  | 2011/4/26 | 2011/5/11 |
| 2012-2013 | 2013/1/20 | 2013/1/23 | 2013/5/9  | 2013/5/19 |
| 2013-2014 | 2014/1/14 | 2014/1/21 | 2014/4/17 | 2014/4/29 |
| 2014-2015 | 2015/1/8  | 2015/1/17 | 2015/4/9  | 2015/4/27 |
| 2015-2016 | NCF       | NCF       | NCF       | NCF       |
| 2016-2017 | NCF       | NCF       | NCF       | NCF       |
| 2017-2018 | 2018/2/14 | 2018/2/22 | 2018/4/15 | 2018/5/3  |
| 2018-2019 | 2019/1/7  | 2019/1/16 | 2019/4/23 | 2019/5/6  |
| 2019-2020 | 2020/1/19 | 2020/1/27 | 2020/4/27 | 2020/5/12 |
| 2020-2021 | 2021/2/9  | 2021/2/23 | 2021/3/28 | 2021/4/11 |

**Table S5.** Lake ice phenology parameters during 2002 to 2021 in Nam Co extracted by the eastern pixel.

| Year      | FUS       | FUE       | BUS       | BUE       |
|-----------|-----------|-----------|-----------|-----------|
| 2002-2003 | 2003/1/14 | 2003/1/18 | 2003/4/19 | 2003/5/4  |
| 2003-2004 | 2004/1/8  | 2004/1/26 | 2004/4/14 | 2004/4/29 |
| 2004-2005 | 2005/1/19 | 2005/1/30 | 2005/4/25 | 2005/5/9  |
| 2005-2006 | 2006/1/22 | 2006/1/28 | 2006/4/14 | 2006/4/26 |
| 2006-2007 | 2007/1/18 | 2007/1/31 | 2007/4/28 | 2007/5/8  |
| 2007-2008 | 2008/1/21 | 2008/1/30 | 2008/4/26 | 2008/5/10 |
| 2008-2009 | 2009/2/1  | 2009/2/6  | 2009/4/12 | 2009/4/27 |
| 2009-2010 | 2010/1/19 | 2010/2/8  | 2010/4/6  | 2010/4/21 |
| 2010-2011 | 2011/1/27 | 2011/2/2  | 2011/5/2  | 2011/5/10 |
| 2012-2013 | 2013/1/2  | 2013/1/10 | 2013/5/9  | 2013/5/24 |
| 2013-2014 | 2014/1/12 | 2014/1/13 | 2014/4/29 | 2014/5/11 |
| 2014-2015 | 2015/1/1  | 2015/1/12 | 2015/4/20 | 2015/4/28 |
| 2015-2016 | 2016/1/20 | 2016/1/31 | 2016/4/2  | 2016/4/14 |
| 2016-2017 | 2017/2/3  | 2017/2/18 | 2017/4/18 | 2017/4/26 |
| 2017-2018 | 2018/2/8  | 2018/2/12 | 2018/4/19 | 2018/5/6  |
| 2018-2019 | 2019/1/3  | 2019/1/12 | 2019/4/22 | 2019/5/2  |
| 2019-2020 | 2020/1/20 | 2020/1/29 | 2020/5/4  | 2020/5/11 |
| 2020-2021 | 2021/2/9  | 2021/2/16 | 2021/4/11 | 2021/4/21 |

## Description of extraction method of lake ice phenological events:

The following example will be used to describe the extraction process of lake ice phenological parameters. Only one pixel in the center of the lake is selected to judge the freezing-thawing dates according to the change of brightness temperature. The linear interpolation method is used to complete the missing brightness temperature data, and the median filtering method is used to denoise the brightness temperature sequence. On this basis, Formula 1-6 was used to extract the phenological parameters of lake ice, and finally visual interpretation was used to correct the extraction results. The specific extraction process is as follows (The determination of lake ice phenological parameters in Nam Co during 2005-2006 was taken as an example):

- (1) The brightness temperature sequence after interpolation and filtering is denoted as TB, and the brightness temperature on the  $i$ th day is denoted as  $TB_i$  ( $i=1,2,3,\dots,365$  or  $366$ ). Combined with TB, a 7-day moving time window was selected to calculate the time series of brightness temperature difference, which was denoted as DTB. The brightness temperature difference on the  $i-3$  day can be calculated by:

$$DTB_{i-3} = (TB_i + TB_{i-1} + TB_{i-2} + TB_{i-3})/4 - (TB_{i-4} + TB_{i-5} + TB_{i-6} + TB_{i-7})/4, \quad i=4,5,6,\dots,362 \text{ or } 363$$

For example:

TB sequence is:  $TB_1, TB_2, TB_3, \dots, TB_{359}, TB_{360}, TB_{361}, TB_{362}, TB_{363}, TB_{364}, TB_{365}$

DTB sequence is:  $DTB_1, DTB_2, DTB_3, \dots, DTB_i, \dots, DTB_{362}$

where

$$DTB_1 = (TB_1 + TB_2 + TB_3 + TB_4)/4 - (TB_4 + TB_5 + TB_6 + TB_7)/4$$

$$DTB_2 = (TB_2 + TB_3 + TB_4 + TB_5)/4 - (TB_5 + TB_6 + TB_7 + TB_8)/4$$

...

$$DTB_{i-3} = (TB_i + TB_{i-1} + TB_{i-2} + TB_{i-3})/4 - (TB_{i-4} + TB_{i-5} + TB_{i-6} + TB_{i-7})/4$$

...

$$DTB_{362} = (TB_{359} + TB_{360} + TB_{361} + TB_{362})/4 - (TB_{362} + TB_{363} + TB_{364} + TB_{365})/4$$

- (2) Since the brightness temperature changes most obviously during freeze-up and break-up, the brightness temperature curve will present an elevated platform, and the edge of the elevated platform corresponds to FUE and BUS (Figure S5). The brightness temperature difference time series (DTB) can reflect the speed of brightness temperature increase/decrease, so the minimum and maximum values of DTB can be calculated to determine the approximate dates of freeze-up end and break-up start (denoted as FUE1, BUS1), which respectively correspond to equations 1 and 2. The specific dates of freeze-up end and break-up start are determined by FUE1, BUS1 and the brightness temperature threshold. The brightness temperature threshold is obtained by calculating the mean value of the brightness temperature near FUE1 and BUS1 in a month. Within 10 days near FUE1 (or BUS1), find the dates whose brightness temperature are greater than the brightness temperature threshold, and among them, select the date with the minimum (or maximum) brightness temperature difference as the final FUE (or BUS). The flow chart for determining FUE is as follow, where the time step is introduced to make the brightness temperature threshold as large as possible, so as to ensure that FUE and BUS are at the edge of brightness temperature platform. The results are shown in Figure S5.



$$FUE1 = \min((TB_i + TB_{i-1} + TB_{i-2} + TB_{i-3})/4 - (TB_i + TB_{i+1} + TB_{i+2} + TB_{i+3})/4) = \min(DTB_{i-3}), \quad (S1)$$

$$BUS1 = \max((TB_i + TB_{i-1} + TB_{i-2} + TB_{i-3})/4 - (TB_i + TB_{i+1} + TB_{i+2} + TB_{i+3})/4) = \max(DTB_{i-3}), \quad (S2)$$

where  $i=4,5,6,\dots,362$  or  $363$

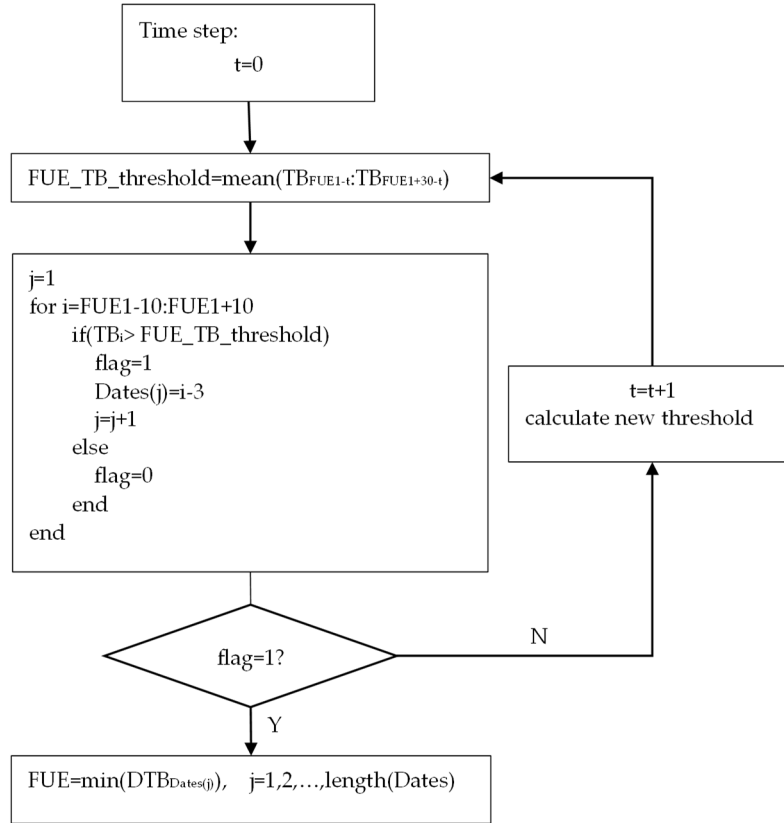

- (3) The positive and negative curve intersection method of Qiu et al. (Qiu et al., 2018) combined with the brightness temperature threshold was used to determine FUS and BUE. The specific operation is as follows: Find the intersection points of Y1 (Equation (3)) and Y4 (Equation (6)) curves, and select the third closest intersection point on the left side of FUE as FUS1; Find the intersection points of Y2 (Equation (4)) and Y3 (Equation (5)) curves, and select the third closest intersection point on the right side of BUS as BUE1; The average brightness temperature of a month before FUS1 is used as the threshold of FUS, and the first minimum brightness temperature point less than the threshold on the left of FUE is selected as the final FUS; The average brightness temperature of a month after BUE1 is used as the threshold of BUE, and the first minimum brightness temperature point less than the threshold on the right of BUS is selected as the final BUE. (Figure S5)

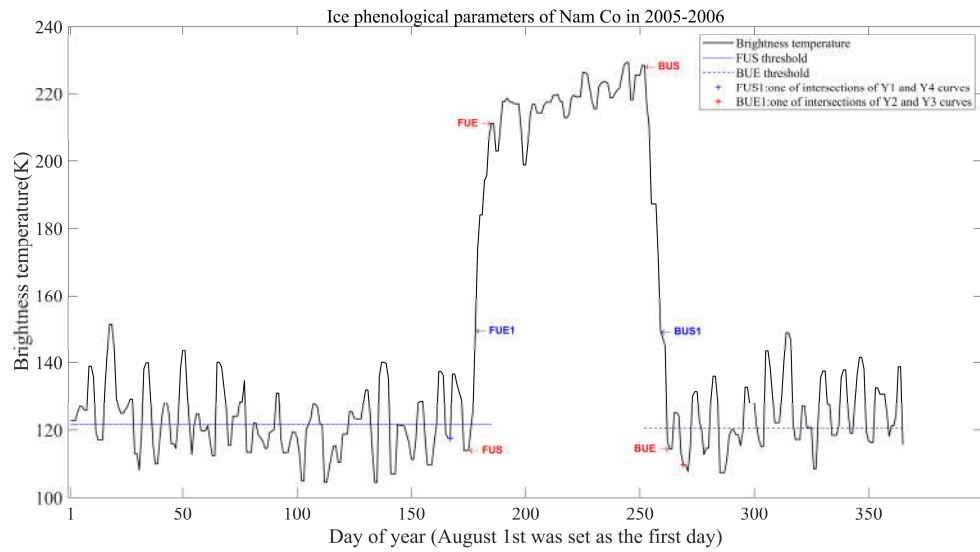

**Figure S5.** Determination of phenological parameters of Nam Co in 2005–2006.

- (4) Finally, the visual interpretation results of brightness temperature curves were used to verify the automatic extraction results of lake ice phenological dates. If extraction results are not reasonable, visual interpretation should be used instead.

#### References:

Qiu, Y.; Wang, X.; Ruan, Y.; Xie, P, Passive microwave remote sensing of lake freeze-thawing over Qinghai-Tibet Plateau. *J. Lake Sci.* **2018**, *30*, 1438–1449.
